# Supplementary material for: FDHE-IW: A Fast Approach for Detecting High-Order Epistasis in Genome-Wide Case-Control Studies
Source: MDPI journal article supplement (doi:10.3390/genes9090435), 2018-08-29
Supplement: s1 [file s1]

# FDHE-IW: a fast approach for detecting high-order epistasis in genome-wide case-control studies

**Table 5.** 4-way SNP combinations identified using a G-test.

| snp1      | Gen1 | snp2      | Gen2 | snp3      | Gen3 | snp4      | Gen4 | p-value |
|-----------|------|-----------|------|-----------|------|-----------|------|---------|
| rs1740752 | PCCA | rs4772270 | NA   | rs7044653 | NA   | rs6598991 | NA   | 0       |
| rs4772270 | NA   | rs7044653 | NA   | rs1329428 | CFH  | rs6598991 | NA   | 0       |

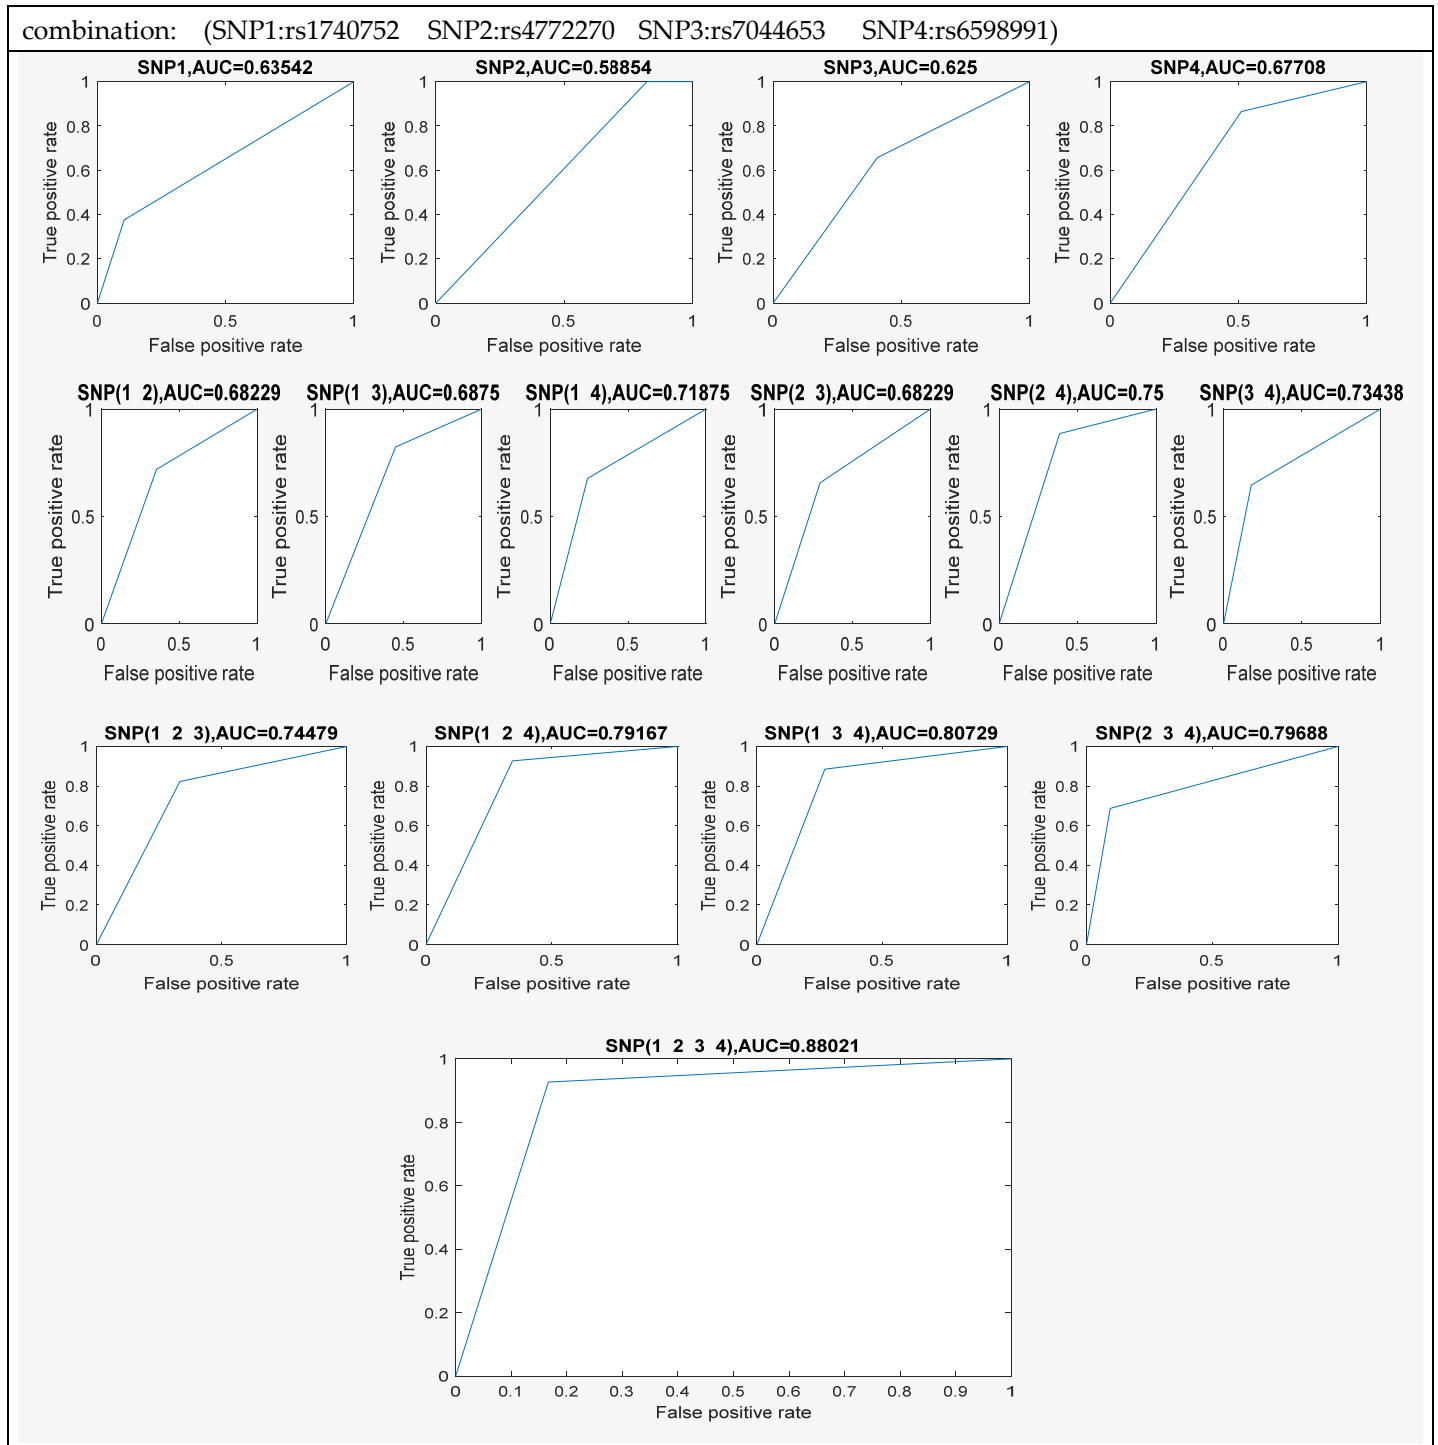

**Figure S1.** AUC curves of 4-way SNP combination  
(SNP1: rs1740752 SNP2: rs4772270 SNP3: rs7044653 SNP4: rs6598991)

SNP combination (SNP1:rs4772270, SNP2: rs7044653, SNP3:rs1329428, SNP4:rs6598991)

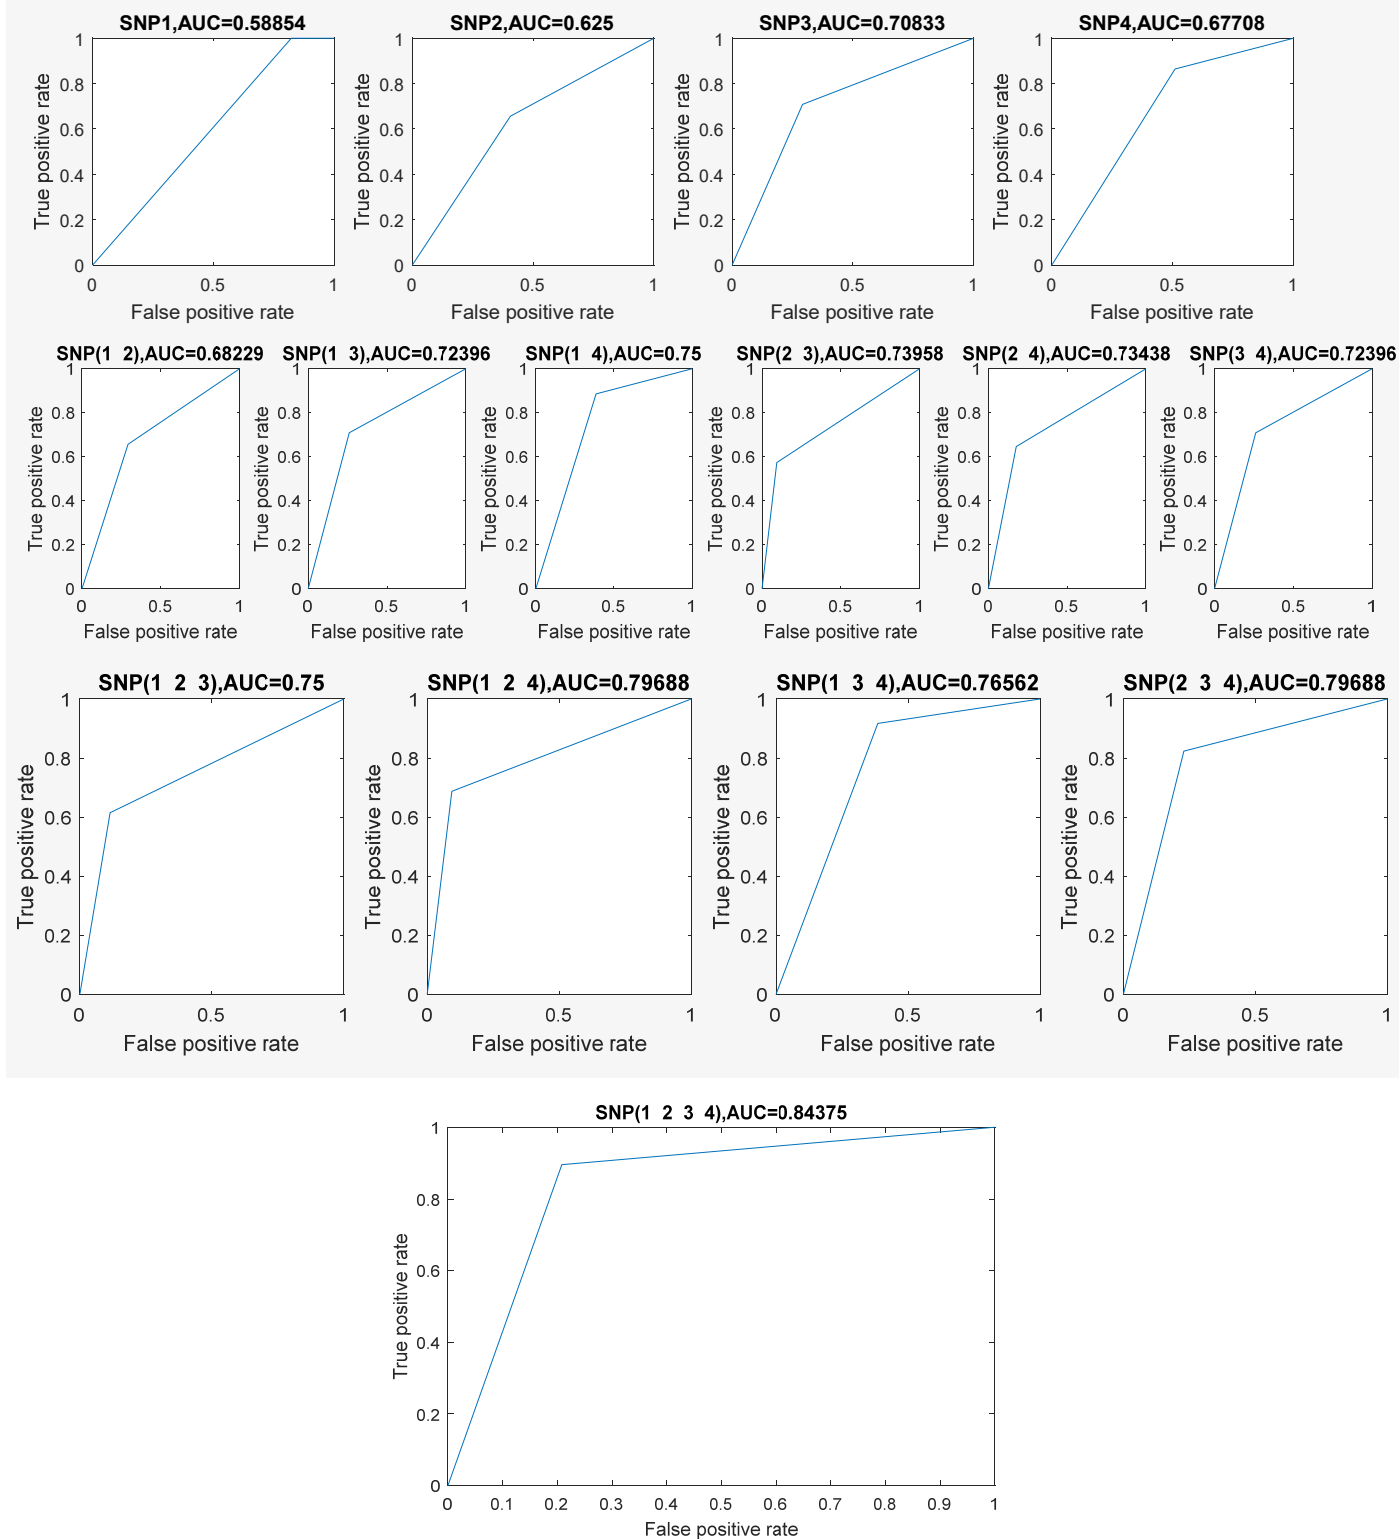

Figure S2. AUC curves of 4-way SNP combination  
(SNP1: rs4772270, SNP2: rs7044653, SNP3: rs1329428, SNP4: rs6598991)
