# Supplementary material for: FDHE-IW: A Fast Approach for Detecting High-Order Epistasis in Genome-Wide Case-Control Studies
Source: MDPI journal article supplement (doi:10.3390/genes9090435), 2018-08-29
Supplement: s1 [file s1]

# FDHE-IW: a fast approach for detecting high-order epistasis in genome-wide case-control studies

Shouheng Tuo

School of Computer Science & Technology, Xi'an University of Posts & Telecommunications, 710121, China; [tuo\\_sh@126.com](mailto:tuo_sh@126.com)

## DME models

The DME (**disease loci with marginal effects**) model has both main effects and interaction effects. Twelve disease models (Model 1-Model 12) are composed of multiplicative model, threshold model and concrete model.

**DME 1- DME 4** ( $H^2=0.005$ ,  $MAF=0.05$ ,  $0.1$ ,  $0.2$  and  $0.5$ ) are **multiplicative models** with two disease locus, in which the disease prevalence given the frequency of genotype combination increases multiplicatively with the incremental presence of the disease. The genetic heritability ( $H^2$ ) of DME 1- DME 4 are all equal to  $0.005$ , minor allele frequencies (MAF) of them equal  $0.05$ ,  $0.1$ ,  $0.2$  and  $0.5$ , respectively.

**DME 5- DME 8** ( $H^2=0.02$ ,  $MAF=0.05$ ,  $0.1$ ,  $0.2$  and  $0.5$ ) are the **threshold models** in which the prevalence of genotype frequency does not increase until the number of disease alleles pass the threshold).

**DME 9- DME 12** ( $H^2=0.02$ ,  $MAF=0.05$ ,  $0.1$ ,  $0.2$  and  $0.5$ ) are **concrete model** used to mimic the effect that epistasis has on susceptibility to handedness and the color of swine (Marchini, et al., 2005; Neuman, et al., 1992).

Table S1 presents the **penetrance functions** of three models (**multiplicative models**, **threshold models**, **concrete model**) [1][2]

Table S1. Penetrance functions of the three DME epistasis models [2]

| Model 1 |    | Loci 1            |                     |                     |
|---------|----|-------------------|---------------------|---------------------|
|         |    | AA                | Aa                  | aa                  |
| Loci 2  | BB | $\alpha$          | $\alpha$            | $\alpha$            |
|         | Bb | $\alpha$          | $\alpha(1+\beta)^2$ | $\alpha(1+\beta)^3$ |
|         | bb | $\alpha$          | $\alpha(1+\beta)^3$ | $\alpha(1+\beta)^4$ |
| Model 2 |    | Loci 1            |                     |                     |
|         |    | AA                | Aa                  | aa                  |
| Loci 2  | BB | $\alpha$          | $\alpha$            | $\alpha$            |
|         | Bb | $\alpha$          | $\alpha(1+\beta)$   | $\alpha(1+\beta)$   |
|         | bb | $\alpha$          | $\alpha(1+\beta)$   | $\alpha(1+\beta)$   |
| Model 3 |    | Loci 1            |                     |                     |
|         |    | AA                | Aa                  | aa                  |
| Loci 2  | BB | $\alpha$          | $\alpha(1+\beta)$   | $\alpha(1+\beta)$   |
|         | Bb | $\alpha(1+\beta)$ | $\alpha$            | $\alpha$            |
|         | bb | $\alpha(1+\beta)$ | $\alpha$            | $\alpha$            |

Table S2. the parameters ( $H^2$ : genetic heritability, the disease prevalence  $P(D)$ ) and the penetrance values of 12 DME models

| DME     | $H^2$ | MAF  | P(D) | AABB  |
|---------|-------|------|------|-------|-------|-------|-------|-------|-------|-------|-------|-------|
| DME -1  | 0.005 | 0.05 | 0.1  | 0.098 | 0.098 | 0.098 | 0.098 | 0.299 | 0.522 | 0.098 | 0.522 | 0.912 |
| DME -2  | 0.005 | 0.1  | 0.1  | 0.096 | 0.096 | 0.096 | 0.096 | 0.197 | 0.282 | 0.096 | 0.282 | 0.405 |
| DME -3  | 0.005 | 0.2  | 0.1  | 0.092 | 0.092 | 0.092 | 0.092 | 0.144 | 0.181 | 0.092 | 0.181 | 0.227 |
| DME -4  | 0.005 | 0.5  | 0.1  | 0.078 | 0.078 | 0.078 | 0.078 | 0.105 | 0.122 | 0.078 | 0.122 | 0.142 |
| DME -5  | 0.02  | 0.05 | 0.1  | 0.096 | 0.096 | 0.096 | 0.096 | 0.533 | 0.533 | 0.096 | 0.533 | 0.533 |
| DME -6  | 0.02  | 0.1  | 0.1  | 0.092 | 0.092 | 0.092 | 0.092 | 0.319 | 0.319 | 0.092 | 0.319 | 0.319 |
| DME -7  | 0.02  | 0.2  | 0.1  | 0.084 | 0.084 | 0.084 | 0.084 | 0.21  | 0.21  | 0.084 | 0.21  | 0.21  |
| DME -8  | 0.02  | 0.5  | 0.1  | 0.052 | 0.052 | 0.052 | 0.052 | 0.137 | 0.137 | 0.052 | 0.137 | 0.137 |
| DME -9  | 0.02  | 0.05 | 0.1  | 0.08  | 0.192 | 0.192 | 0.192 | 0.08  | 0.08  | 0.192 | 0.08  | 0.08  |
| DME -10 | 0.02  | 0.1  | 0.1  | 0.072 | 0.164 | 0.164 | 0.164 | 0.072 | 0.072 | 0.164 | 0.072 | 0.072 |
| DME -11 | 0.02  | 0.2  | 0.1  | 0.061 | 0.146 | 0.146 | 0.146 | 0.061 | 0.061 | 0.146 | 0.061 | 0.061 |
| DME -12 | 0.02  | 0.5  | 0.1  | 0.067 | 0.155 | 0.155 | 0.155 | 0.067 | 0.067 | 0.155 | 0.067 | 0.067 |

## Reference

- [1] Marchini, J., et al. (2005) Genome-wide strategies for detecting multiple loci that influence complex diseases, *Nature genetics*, 37, 413-417.
- [2] Jing P J, Shen H B. MACOED: a multi-objective ant colony optimization algorithm for SNP epistasis detection in genome-wide association studies[J]. *Bioinformatics*, 2015, 31(5):634-641.
